# Supplementary material for: Autologous bone marrow stem cell transplantation via the hepatic artery for the treatment of hepatitis B virus-related cirrhosis: a PRISMA-compliant meta-analysis based on the Chinese population
Source: PubMed Central journal article supplement (PMC7059376; doi:10.1186/s13287-020-01627-5), 2020-03-05

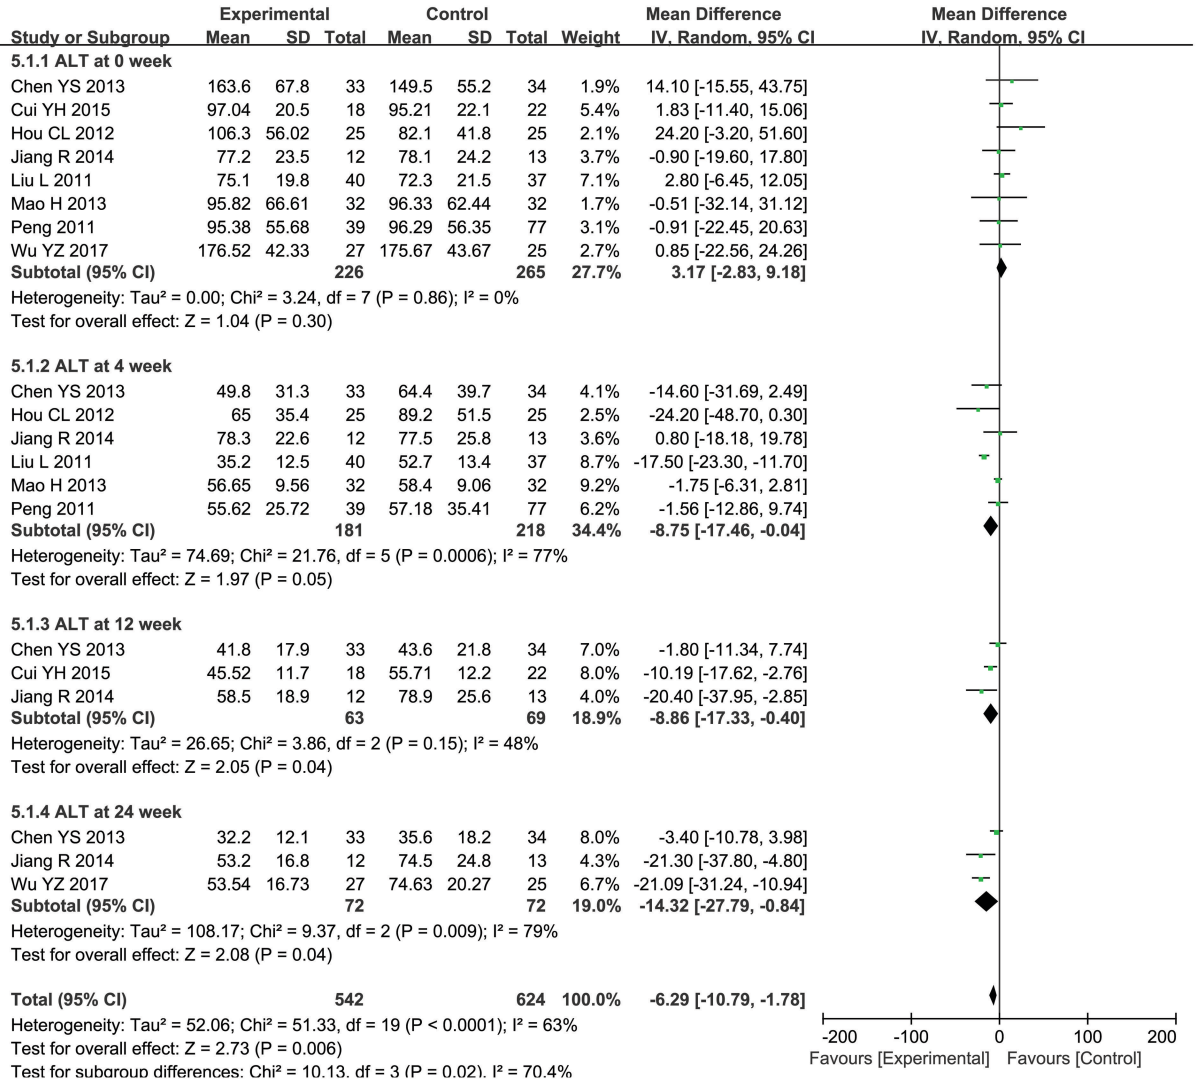

Supplement: 13287_2020_1627_MOESM4_ESM.pdf [file 13287_2020_1627_MOESM4_ESM.pdf]
